# Supplementary material for: Genomic mechanisms of resistance to tyrosine kinase inhibitors in HER2 amplified breast cancer
Source: Research Square preprint supplement (doi:10.21203/rs.3.rs-4270758/v1), 2024-04-22
Supplement: Supplementary file 1 [file 1debb692c0d2e44ddbfc0c57.xlsx]

## Sheet: Sheet1
Patient_ID	Pathway	Gene	Protein_change	Variant_Classification	Chromosome	Start_position	Reference_Allele	Tumor_Seq_Allele	OG/TSG	functional_effect	hotspot	gene_in_oncokb	variant_in_oncokb	Level of evidence	ClinVar Annotation	Cosmic Annotation	clonal_status	trajectory
Pt 4	Cell Cycle	CDKN1B	p.NFD61fs	Frame_Shift_Del	12	12870956	TTTCGAT	-	TSG	Likely Loss-of-function	FALSE	TRUE	FALSE	3	N/A	N/A	clonal	truncal
Pt 8	Cell Cycle	RB1	p.RE71fs	Frame_Shift_Del	13	48881489	AGAG	-	TSG	Likely Loss-of-function	FALSE	TRUE	FALSE	3	N/A	N/A	clonal	truncal
Pt 1	ESR1	ESR1	p.Y537S	Missense_Mutation	6	152419923	A	C	OG	Gain-of-function	TRUE	TRUE	TRUE	2			subclonal	growing
Pt 1	ESR1	ESR1	p.D538G	Missense_Mutation	6	152419926	A	G	OG	Gain-of-function	TRUE	TRUE	TRUE	2			subclonal	growing
Pt 14	ESR1	ESR1	p.D538G	Missense_Mutation	6	152419926	A	G	OG	Gain-of-function	TRUE	TRUE	TRUE	2			subclonal	growing
Pt 14	ESR1	GATA3	p.HMLT414fs	Frame_Shift_Del	10	8115893	CCACATGCTGA	-	OG	Likely Loss-of-function	FALSE	TRUE	FALSE	3	N/A	N/A	clonal	truncal
Pt 16	ESR1	KMT2A	p.I1129V	Missense_Mutation	11	118348732	A	G	OG	Unknown	FALSE	TRUE	FALSE	4	N/A	N/A	subclonal	growing
Pt 19	ESR1	PGR	p.G408S	Missense_Mutation	11	100998580	C	T	TSG	Unknown	FALSE	TRUE	FALSE	2	N/A	Confirmed somatic colon carcinoma	subclonal	growing
Pt 20	ESR1	ESR1	p.Y537S	Missense_Mutation	6	152419923	A	C	OG	Gain-of-function	TRUE	TRUE	TRUE	2			subclonal	growing
Pt 20	ESR1	ESR1	p.D538G	Missense_Mutation	6	152419926	A	G	OG	Gain-of-function	TRUE	TRUE	TRUE	2			subclonal	shrinking
Pt 23	ESR1	PGR	p.S403F	Missense_Mutation	11	100998594	G	A	TSG	Unknown	FALSE	TRUE	FALSE	4	N/A	N/A	clonal	truncal
Pt 24	ESR1	ESR1	p.D538G	Missense_Mutation	6	152419926	A	G	OG	Gain-of-function	TRUE	TRUE	TRUE	2			subclonal	growing
Pt 26	ESR1	BRCA1	p.N1745I	Missense_Mutation	17	41209112	T	A		Unknown	FALSE	TRUE	FALSE	4	N/A	N/A	subclonal	growing
Pt 26	ESR1	ESR1	p.D538G	Missense_Mutation	6	152419926	A	G	OG	Gain-of-function	TRUE	TRUE	TRUE	2			subclonal	stable_mixed
Pt 3	ESR1	PGR	p.D608G	Missense_Mutation	11	100962574	T	C	TSG	Unknown	FALSE	TRUE	FALSE	4	N/A	N/A	clonal	truncal
Pt 3	ESR1	FOXA1	p.Q209P	Missense_Mutation	14	38061363	T	G	OG	Unknown	FALSE	TRUE	FALSE	4	N/A	N/A	clonal	truncal
Pt 9	ESR1	MTA1	p.V657fs	Frame_Shift_Ins	14	105936300	-	A				FALSE		4	N/A	N/A	clonal	truncal
Pt 9	ESR1	GATA3	p.S397fs	Frame_Shift_Ins	10	8115842	-	T	OG	Likely Loss-of-function	FALSE	TRUE	FALSE	3	N/A	N/A	clonal	truncal
Pt 1	HIPPO	FAT1	p.F1300I	Missense_Mutation	4	187557813	A	T	TSG	Unknown	FALSE	TRUE	FALSE	4	N/A	N/A	subclonal	growing
Pt 1	HIPPO	FAT4	p.E2886Q	Missense_Mutation	4	126370827	G	C	TSG	Unknown		FALSE		4	N/A	N/A	subclonal	growing
Pt 12	HIPPO	NF2	p.R462H	Missense_Mutation	22	30070869	G	A	TSG	Unknown	FALSE	TRUE	FALSE	2	Likely benign/VUS	Confirmed somatic status (Large intestine carcinoma)	clonal	truncal
Pt 12	HIPPO	PTPN14	p.S1031R	Missense_Mutation	1	214542978	G	T	TSG			FALSE		4	N/A	N/A	clonal	truncal
Pt 17	HIPPO	FAT4	p.I3124M	Missense_Mutation	4	126371543	T	G	TSG	Unknown		FALSE		4	N/A	N/A	subclonal	growing
Pt 17	HIPPO	FAT4	p.W4304*	Nonsense_Mutation	4	126408595	G	A	TSG	Unknown		FALSE		2	N/A	Confirmed somatic status (Colon carcinoma)	subclonal	growing
Pt 17	HIPPO	LATS1	p.L429P	Missense_Mutation	6	150004939	A	G	TSG	Unknown	FALSE	TRUE	FALSE	4	N/A	N/A	subclonal	stable_mixed
Pt 18	HIPPO	CRB2	p.G140D	Splice_Site	9	126128196	G	A	TSG			FALSE		4	VUS	N/A	subclonal	growing
Pt 2	HIPPO	HMCN1	p.D4142N	Missense_Mutation	1	186092277	G	A	TSG			FALSE		4	N/A	N/A	clonal	truncal
Pt 2	HIPPO	TAOK2	p.E349K	Missense_Mutation	16	29994438	G	A	TSG			FALSE		2	N/A	Confirmed somatic status (Large intestine carcinoma)	subclonal	shrinking
Pt 2	HIPPO	TAOK3	p.M224I	Missense_Mutation	12	118651887	C	G	TSG			FALSE		4	N/A	N/A	subclonal	shrinking
Pt 22	HIPPO	LATS1	p.E132Q	Missense_Mutation	6	150016312	C	G	TSG	Unknown	FALSE	TRUE	FALSE	4	N/A	N/A	subclonal	growing
Pt 23	HIPPO	MOB1B	p.S134*	Nonsense_Mutation	4	71840995	C	G	TSG			FALSE		4	N/A	N/A	clonal	truncal
Pt 25	HIPPO	FAT2	p.E1017Q	Missense_Mutation	5	150945444	C	G	TSG			FALSE		4	N/A	N/A	clonal	truncal
Pt 25	HIPPO	TAOK1	p.S360C	Missense_Mutation	17	27825414	A	T	TSG			FALSE		4	N/A	N/A	clonal	truncal
Pt 3	HIPPO	CRB1	p.D720V	Missense_Mutation	1	197396614	A	T	TSG			FALSE		4	Likely pathogenic (but not in setting of cancers)	N/A	subclonal	growing
Pt 3	HIPPO	TEAD1	p.T309P	Missense_Mutation	11	12946510	A	C	OG			FALSE		4	N/A	N/A	subclonal	growing
Pt 3	HIPPO	TEAD1	p.K173T	Missense_Mutation	11	12903448	A	C	OG			FALSE		4	N/A	N/A	subclonal	growing
Pt 7	HIPPO	HMCN1	p.V965I	Missense_Mutation	1	185953403	G	A	TSG			FALSE		4	VUS	N/A	clonal	truncal
Pt 11	MYC	MLXIPL	p.S631F	Missense_Mutation	7	73010740	G	A	OG			FALSE		4	N/A	N/A	subclonal	growing
Pt 7	MYC	MLXIP	p.E859*	Nonsense_Mutation	12	122625567	G	T	OG			FALSE		4	N/A	N/A	subclonal	growing
Pt 1	NOTCH	NOTCH4	p.F1030V	Missense_Mutation	6	32171944	A	C	TSG	Unknown	FALSE	TRUE	FALSE	2	N/A	Confirmed somatic (Squamous cell carcinoma)	subclonal	growing
Pt 13	NOTCH	LFNG	p.D150E	Missense_Mutation	7	2564346	C	A				FALSE		4	N/A	N/A	subclonal	growing
Pt 17	NOTCH	NOTCH3	p.D1184Y	Missense_Mutation	19	15290004	C	A	TSG	Unknown	FALSE	TRUE	FALSE	2	N/A	Confirmed somatic (Lung carcinoma)	subclonal	stable_mixed
Pt 2	NOTCH	CREBBP	p.S1377L	Missense_Mutation	16	3790403	G	A	TSG	Unknown	FALSE	TRUE	FALSE	4	N/A	N/A	subclonal	shrinking
Pt 2	NOTCH	CTBP2	p.P320A	Missense_Mutation	10	126681852	G	C				FALSE		4	N/A	N/A	subclonal	growing
Pt 2	NOTCH	EP300	p.R200Q	Missense_Mutation	22	41513695	G	A	TSG	Unknown	FALSE	TRUE	FALSE	4	N/A	N/A	subclonal	growing
Pt 2	NOTCH	NCOR2	p.D1934V	Missense_Mutation	12	124821646	T	A	TSG	Unknown	FALSE	TRUE	FALSE	4	N/A	N/A	clonal	truncal
Pt 20	NOTCH	PSEN1	p.L134M	Missense_Mutation	14	73640335	C	A					FALSE	4	N/A	N/A	subclonal	stable_mixed
Pt 22	NOTCH	SPEN		Splice_Site	1	16237595	G	C	TSG	Likely Loss-of-function	FALSE	TRUE	FALSE	3			clonal	truncal
Pt 25	NOTCH	CTBP1	p.E330K	Missense_Mutation	4	1207299	C	T				FALSE		4	N/A	N/A	subclonal	stable_mixed
Pt 3	NOTCH	NOTCH2	p.K474M	Missense_Mutation	1	120510088	T	A	TSG	Unknown	FALSE	TRUE	FALSE	4	N/A	N/A	subclonal	growing
Pt 5	NOTCH	CREBBP	p.S584P	Missense_Mutation	16	3830806	A	G	TSG	Unknown	FALSE	TRUE	FALSE	4	Likely Benign	N/A	subclonal	growing
Pt 8	NOTCH	EP300	p.R370H	Missense_Mutation	22	41523693	G	A	TSG	Unknown	FALSE	TRUE	FALSE	2	N/A	Confirmed somatic (Stomach/ovary/large intestine carcinoma)	subclonal	growing
Pt 1	PI3K	PIK3CA	p.453_	In_Frame_Del	3	178928080	AAGATTTGC	-	OG	Gain-of-function	TRUE	TRUE	FALSE	1	N/A	N/A	clonal	truncal
Pt 1	PI3K	PIK3CA	p.E81Q	Missense_Mutation	3	178916854	G	C	OG	Unknown	TRUE	TRUE	FALSE	4	N/A	N/A	subclonal	growing
Pt 11	PI3K	PIK3CA	p.H1047R	Missense_Mutation	3	178952085	A	G	OG	Gain-of-function	TRUE	TRUE	TRUE	1	Pathogenic	Confirmed somatic in breast cancer	clonal	truncal
Pt 12	PI3K	PIK3R1	p.K567E	Missense_Mutation	5	67591106	A	G	TSG	Unknown	TRUE	TRUE	TRUE	2	Pathogenic	Confirmed somatic stomach carcinoma	clonal	truncal
Pt 16	PI3K	PIK3CA	p.H1047R	Missense_Mutation	3	178952085	A	G	OG	Gain-of-function	TRUE	TRUE	TRUE	1	Pathogenic	Confirmed somatic in breast cancer	clonal	truncal
Pt 21	PI3K	PIK3CA	p.E365K	Missense_Mutation	3	178922324	G	A	OG	Gain-of-function	TRUE	TRUE	TRUE	1	Pathogenic	Confirmed somatic in breast cancer	subclonal	growing
Pt 22	PI3K	PIK3CA	p.336_	In_Frame_Ins	3	178921522	-	AATAAAAATTCTTTGTGC	OG	Unknown	FALSE	TRUE	FALSE	2	Confirmed somatic ovarian cancer	N/A	subclonal	growing
Pt 24	PI3K	PIK3CA	p.E542K	Missense_Mutation	3	178936082	G	A	OG	Gain-of-function	TRUE	TRUE	TRUE	1	Pathogenic	Confirmed somatic in breast cancer	clonal	truncal
Pt 25	PI3K	PIK3CA	p.G1007R	Missense_Mutation	3	178951964	G	C	OG	Likely Gain-of-function	TRUE	TRUE	TRUE	1	N/A	Confirmed somatic in breast cancer	clonal	truncal
Pt 3	PI3K	PIK3CA	p.E542K	Missense_Mutation	3	178936082	G	A	OG	Gain-of-function	TRUE	TRUE	TRUE	1	Pathogenic	Confirmed somatic in breast cancer	subclonal	growing
Pt 1	RTK RAS	CBLC	p.I126V	Missense_Mutation	19	45284184	A	G		Unknown		FALSE		4	N/A	N/A	subclonal	growing
Pt 1	RTK RAS	NTRK3	p.E475Q	Missense_Mutation	15	88576250	C	G	OG	Unknown	FALSE	TRUE	FALSE	4	N/A	N/A	subclonal	growing
Pt 10	RTK RAS	ERBB2	p.A644T	Missense_Mutation	17	37876071	G	A	OG	Likely Gain-of-function	FALSE	TRUE	FALSE	2	N/A	Confirmed somatic status (Lung carcinoma)	clonal	truncal
Pt 12	RTK RAS	ERBB2	p.L755S	Missense_Mutation	17	37880220	T	C	OG	Gain-of-function	TRUE	TRUE	TRUE	1	Likely pathogenic		subclonal	stable_mixed
Pt 16	RTK RAS	RASGRF2	p.K32Q	Missense_Mutation	5	80256651	A	C				FALSE		4	N/A	N/A	clonal	truncal
Pt 16	RTK RAS	FGFR2	p.S129L	Missense_Mutation	10	123324084	G	A	OG	Unknown	FALSE	TRUE	FALSE	2	Confirmed somatic skin cancer	N/A	clonal	truncal
Pt 17	RTK RAS	ERBB2	p.V777L	Missense_Mutation	17	37881000	G	C	OG	Gain-of-function	TRUE	TRUE	TRUE	2	Likely pathogenic		subclonal	growing
Pt 17	RTK RAS	INSRR	p.N47K	Missense_Mutation	1	156824040	G	C				FALSE		4	N/A	N/A	subclonal	stable_mixed
Pt 19	RTK RAS	SHOC2	p.P464L	Missense_Mutation	10	112769112	C	T		Unknown	FALSE	TRUE	FALSE	4	N/A	N/A	clonal	truncal
Pt 19	RTK RAS	FGFR4	p.A553T	Missense_Mutation	5	176522560	G	A	OG	Unknown	FALSE	TRUE	FALSE	2	Confirmed somatic large intenstine carcinoma	N/A	subclonal	growing
Pt 2	RTK RAS	SPRED1	p.S308F	Missense_Mutation	15	38643453	C	T		Unknown	FALSE	TRUE	FALSE	2	N/A	Confirmed somatic from TCGA Skin	clonal	truncal
Pt 2	RTK RAS	NTRK1	p.H503Y	Missense_Mutation	1	156845877	C	T	OG	Unknown	FALSE	TRUE	FALSE	4	Unknown somatic status lung carcinoma	N/A	subclonal	shrinking
Pt 21	RTK RAS	KIT	p.E386Q	Missense_Mutation	4	55575630	G	C	OG	Unknown	FALSE	TRUE	FALSE	4	N/A	N/A	clonal	truncal
Pt 22	RTK RAS	RASGRF2	p.R743T	Missense_Mutation	5	80409497	G	C				FALSE		4	N/A	N/A	subclonal	shrinking
Pt 25	RTK RAS	IRS1	p.N290S	Missense_Mutation	2	227662586	T	C		Unknown	FALSE	TRUE	FALSE	4	VUS (no evidence in BC)	N/A	subclonal	stable_mixed
Pt 25	RTK RAS	RASA2	p.E245*	Nonsense_Mutation	3	141277776	G	T				FALSE		2	N/A	Confirmed somatic from TCGA (Breast)	subclonal	stable_mixed
Pt 26	RTK RAS	IGF1R	p.E1298Q	Missense_Mutation	15	99500459	G	C	OG	Unknown	FALSE	TRUE	FALSE	4	N/A	N/A	clonal	truncal
Pt 3	RTK RAS	RASAL2	p.L384V	Missense_Mutation	1	178414764	T	G				FALSE		4	N/A	N/A	subclonal	growing
Pt 3	RTK RAS	IRS2	p.F255V	Missense_Mutation	13	110437638	A	C	OG	Unknown	FALSE	TRUE	FALSE	4	N/A	N/A	subclonal	growing
Pt 3	RTK RAS	PDGFRA	p.L1012R	Missense_Mutation	4	55156634	T	G	OG	Unknown	FALSE	TRUE	FALSE	4	N/A	N/A	subclonal	growing
Pt 3	RTK RAS	RET	p.I580S	Missense_Mutation	10	43608391	T	G	OG	Unknown	FALSE	TRUE	FALSE	4	N/A	N/A	clonal	truncal
Pt 4	RTK RAS	FGFR2	p.N549K	Missense_Mutation	10	123258034	A	T	OG	Gain-of-function	TRUE	TRUE	TRUE	2	Likely pathogenic		subclonal	growing
Pt 4	RTK RAS	MRAS	p.Y92H	Missense_Mutation	3	138116246	T	C				FALSE		4	N/A	N/A	subclonal	growing
Pt 4	RTK RAS	ABL1	p.A1109T	Missense_Mutation	9	133761002	G	A	OG	Unknown	FALSE	TRUE	FALSE	4	N/A	N/A	subclonal	growing
Pt 5	RTK RAS	ERBB2	p.L755S	Missense_Mutation	17	37880220	T	C	OG	Gain-of-function	TRUE	TRUE	TRUE	1	Likely pathogenic		subclonal	stable_mixed
Pt 8	RTK RAS	RASA3	p.V446E	Missense_Mutation	13	114780753	A	T				FALSE		4	N/A	N/A	clonal	truncal
Pt 8	RTK RAS	SPRED2	p.V310M	Missense_Mutation	2	65540964	C	T				FALSE		4	N/A	N/A	subclonal	growing
Pt 9	RTK RAS	ERBB2	p.D769Y	Missense_Mutation	17	37880261	G	T	OG	Gain-of-function	TRUE	TRUE	TRUE	1	Pathogenic/Likely pathogenic		subclonal	growing
Pt 9	RTK RAS	ERBB2	p.T733I	Missense_Mutation	17	37879903	C	T	OG	Likely Gain-of-function	TRUE	TRUE	TRUE	2	N/A	Confirmed somatic from TCGA uterine	subclonal	shrinking
Pt 9	RTK RAS	NF1		Splice_Site	17	29541468	G	C	TSG	Likely Loss-of-function	FALSE	TRUE	FALSE	3			subclonal	growing
Pt 9	RTK RAS	ERBB2	p.D582N	Missense_Mutation	17	37873579	G	A	OG	Unknown	FALSE	TRUE	FALSE	4	Unknown somatic status pharynx carcinoma	N/A	clonal	truncal
Pt 9	RTK RAS	ERBB2	p.G727A	Missense_Mutation	17	37879885	G	C	OG	Inconclusive	FALSE	TRUE	TRUE	2	Confirmed somatic breast cancer	N/A	subclonal	shrinking
Pt 9	RTK RAS	ERBB2	p.D1016Y	Missense_Mutation	17	37883143	G	T	OG	Unknown	FALSE	TRUE	FALSE	4	N/A	VUS	subclonal	shrinking
Pt 16	TGF-Beta	ACVR2A	p.G240A	Missense_Mutation	2	148674898	G	C	TSG	Unknown		FALSE		4	N/A	N/A	subclonal	growing
Pt 16	TGF-Beta	TGFBR2	p.D446N	Missense_Mutation	3	30715678	G	A	TSG	Unknown	FALSE	TRUE	TRUE	4	Pathogenic	N/A	clonal	truncal
Pt 21	TGF-Beta	SMAD4	p.R135*	Nonsense_Mutation	18	48575209	C	T	TSG	Likely Loss-of-function	FALSE	TRUE	FALSE	2	N/A	Confirmed somatic stomach carcinoma	clonal	truncal
Pt 1	TP53	CHEK2	p.A392V	Missense_Mutation	22	29091782	G	A	TSG	Unknown	FALSE	TRUE	FALSE	4	Uncertain significance	N/A	subclonal	growing
Pt 10	TP53	TP53	p.R213*	Nonsense_Mutation	17	7578212	G	A	TSG	Likely Loss-of-function	FALSE	TRUE	FALSE	2	N/A	Confirmed somatic breast carcinoma	clonal	truncal
Pt 13	TP53	TP53	p.C275F	Missense_Mutation	17	7577114	C	A	TSG	Likely Loss-of-function	TRUE	TRUE	TRUE	2	Likely pathogenic	Confirmed somatic lung carcinoma	clonal	truncal
Pt 15	TP53	TP53		Missense_Mutation	17	7577094	G	A	TSG	Likely Loss-of-function	TRUE	TRUE	TRUE	3			clonal	truncal
Pt 16	TP53	TP53	p.L350P	Missense_Mutation	17	7573978	A	G	TSG	Unknown	FALSE	TRUE	FALSE	2	Uncertain significance	Confirmed somatic stomach carcinoma	subclonal	shrinking
Pt 17	TP53	TP53		Splice_Site	17	7578556	T	C	TSG	Likely Loss-of-function	FALSE	TRUE	FALSE	3			clonal	truncal
Pt 18	TP53	TP53	p.I254N	Missense_Mutation	17	7577520	A	T	TSG	Likely Loss-of-function	TRUE	TRUE	FALSE	2	Pathogenic	Confirmed somatic breast carcinoma	subclonal	growing
Pt 19	TP53	TP53	p.R213*	Nonsense_Mutation	17	7578212	G	A	TSG	Likely Loss-of-function	FALSE	TRUE	FALSE	2	Uncertain significance	Confirmed somatic breast carcinoma	clonal	truncal
Pt 21	TP53	TP53	p.Y220C	Missense_Mutation	17	7578190	T	C	TSG	Loss-of-function	TRUE	TRUE	TRUE	2	Pathogenic	Confirmed somatic breast carcinoma	clonal	truncal
Pt 23	TP53	TP53	p.G245A	Missense_Mutation	17	7577547	C	G	TSG	Likely Loss-of-function	TRUE	TRUE	TRUE	2	Likely pathogenic	Confirmed somatic endometrium carcinoma	clonal	truncal
Pt 24	TP53	TP53	p.Y126C	Splice_Site	17	7578553	T	C	TSG	Likely Loss-of-function	TRUE	TRUE	FALSE	2	Pathogenic	Confirmed somatic breast carcinoma	clonal	truncal
Pt 3	TP53	TP53		Splice_Site	17	7578555	C	T	TSG	Likely Loss-of-function	FALSE	TRUE	FALSE	3			clonal	truncal
Pt 5	TP53	TP53	p.MN246del	In_Frame_Del	17	7577539	GGTTCA	-	TSG	Likely Loss-of-function	TRUE	TRUE	FALSE	3	N/A	N/A	clonal	truncal
Pt 6	TP53	TP53	p.T256P	Missense_Mutation	17	7577515	T	G	TSG	Likely Loss-of-function	FALSE	TRUE	FALSE	2	Pathogenic	Confirmed somatic breast carcinoma	clonal	truncal
Pt 7	TP53	TP53	p.S241F	Missense_Mutation	17	7577559	G	A	TSG	Likely Loss-of-function	TRUE	TRUE	TRUE	2	Likely pathogenic	Confirmed somatic breast carcinoma	clonal	truncal
Pt 8	TP53	TP53	p.R248G	Missense_Mutation	17	7577539	G	C	TSG	Likely Loss-of-function	TRUE	TRUE	TRUE	2	Likely pathogenic	Confirmed somatic endometrium carcinoma	clonal	truncal
Pt 1	WNT	FZD3	p.G320S	Missense_Mutation	8	28385235	G	A	OG			FALSE		4	Unknown somatic status esophagus carcinoma	N/A	subclonal	growing
Pt 12	WNT	FZD10	p.V312L	Missense_Mutation	12	130648421	G	C	OG			FALSE		4	N/A	N/A	subclonal	growing
Pt 16	WNT	APC	p.*0Q	Nonstop_Mutation	5	112179821	T	C	TSG	Likely Loss-of-function	FALSE	TRUE	FALSE	3	N/A	N/A	subclonal	shrinking
Pt 16	WNT	CHD8	p.P1621S	Missense_Mutation	14	21867821	G	A	TSG			FALSE		4	N/A	N/A	subclonal	growing
Pt 16	WNT	WNT5A	p.K358T	Missense_Mutation	3	55504190	T	G	OG			FALSE		4	N/A	N/A	subclonal	growing
Pt 2	WNT	LZTR1	p.I840M	Missense_Mutation	22	21351634	C	G	TSG	Unknown	FALSE	TRUE	FALSE	2	N/A	Confirmed somatic (lung carcinoma)	subclonal	shrinking
Pt 2	WNT	TLE1	p.D525N	Missense_Mutation	9	84207948	C	T	TSG	Unknown	FALSE	TRUE	FALSE	4	Uncertain significance	N/A	subclonal	growing
Pt 21	WNT	LGR4	p.H209D	Missense_Mutation	11	27405947	G	C	OG			FALSE		4	N/A	N/A	subclonal	growing
Pt 21	WNT	WNT10B	p.D67H	Missense_Mutation	12	49364010	C	G	OG			FALSE		4	N/A	N/A	clonal	truncal
Pt 21	WNT	WNT2	p.Q79*	Nonsense_Mutation	7	116960696	G	A	OG			FALSE		4	N/A	N/A	subclonal	stable_mixed
Pt 24	WNT	WNT4	p.R126W	Missense_Mutation	1	22448007	G	A	OG			FALSE		2	Confirmed somatic thyroid neoplasm	N/A	subclonal	growing
Pt 25	WNT	FZD9	p.R477H	Missense_Mutation	7	72849767	G	A	OG			FALSE		2	Confirmed somatic stomach carcinoma	N/A	subclonal	stable_mixed
Pt 3	WNT	ZNRF3	p.K450T	Missense_Mutation	22	29445518	A	C	TSG	Unknown	FALSE	TRUE	FALSE	4	N/A	N/A	subclonal	growing
Pt 3	WNT	FZD8	p.R134L	Missense_Mutation	10	35929957	C	A	OG			FALSE		4	N/A	N/A	clonal	truncal
Pt 4	WNT	APC	p.N1161I	Missense_Mutation	5	112174773	A	T	TSG	Unknown	FALSE	TRUE	FALSE	4	N/A	N/A	subclonal	growing
Pt 4	WNT	CHD8	p.R1894W	Missense_Mutation	14	21862274	G	A	TSG			FALSE		4	N/A	N/A	subclonal	growing
Pt 8	WNT	TLE2	p.R388H	Missense_Mutation	19	3009550	C	T	TSG	Unknown	FALSE	TRUE	FALSE	4	Uncertain significance	N/A	subclonal	growing
Pt 8	WNT	FZD8	p.V110L	Missense_Mutation	10	35930030	C	G	OG			FALSE		4	N/A	N/A	subclonal	growing
Pt 9	WNT	FRAT1	p.R185*	Nonsense_Mutation	10	99079763	C	T	OG			FALSE		4	N/A	N/A	subclonal	shrinking
